# Supplementary material for: Two decades of satellite observations of AOD over mainland China
Source: Copernicus journal article supplement (doi:10.5194/acp-2017-838), 2017-10-19

Dear Benjamin,

I am very grateful that you found this mistake: indeed I included the wrong figure. The correct Fig. 11 is included below. Since I drafted the text based on this correct Fig.11 it does not need changing.

I have contact the editorial staff to ask for advice on how to proceed, but unfortunately this cannot be changed in the discussion paper. Hence I hope that readers and reviewers will read your comment and our response and we will of course include the correct Fig. 11 in the final revised paper, after review has been completed.

Best regards,

Gerrit and co-authors.

Corrected Fig. 11:

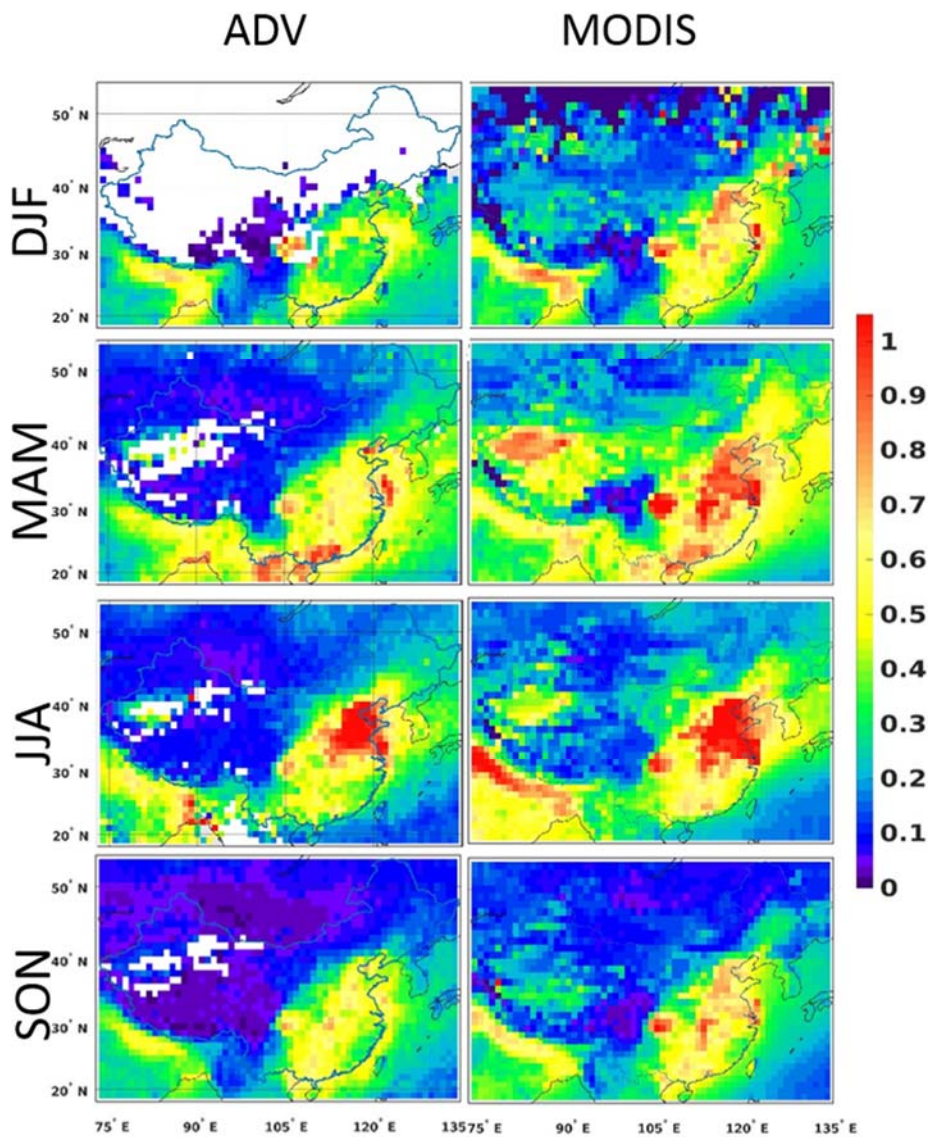

Supplement: Supplementary file [file acp-2017-838-AC1-supplement.pdf]
